1 **MILAN'S FORGOTTEN EPIDEMIC OF SUMMER 1629, A FEW MONTHS BEFORE**  
2 **THE LAST GREAT PLAGUE: AN INVESTIGATION INTO THE POSSIBLE CAUSE.**

3 Massimo Galli<sup>1</sup>, Letizia Oreni<sup>1</sup>, Anna Lisa Ridolfo<sup>1</sup>, Angelo Formenti<sup>1</sup>, Ester Luconi<sup>2</sup>, Patrizia  
4 Boracchi<sup>2</sup>, Spinello Antinori<sup>1</sup>, Elia Biganzoli<sup>2</sup>, Folco Vaglianti<sup>3</sup>.

<sup>1</sup>Unit of Infectious Diseases, Luigi Sacco Department of Biomedical and Clinical Sciences Luigi Sacco, Università degli Studi di Milano, Milan, Italy; <sup>2</sup>Giulio A. Maccacaro Unit of Medical Statistics, Biometry and Bioinformatics, Department of Clinical Sciences and Community Health & DSRC, Università degli Studi di Milano, Milan, Italy; <sup>3</sup>Department of History and Historical Documentation Sciences, Università degli Studi di Milano, Milan, Italy

5 **Key words**: old epidemics; plague; typhoid fever

6 **Short title**: Milan's fever epidemic of summer 1629

7 **World count**: 3125

8

**Correspondence to:**

Prof. Massimo Galli,

Luigi Sacco Department of Biomedical and Clinical Sciences,

Università degli Studi di Milano

Via GB Grassi 74, 20157 Milano, Italy

Tel. +3902390451; Fax: +390250319758

e-mail: [massimo.galli@unimi.it](mailto:massimo.galli@unimi.it)

## Milan's fever epidemic of summer 1629

### 9 **ABSTRACT**

10 An epidemic not attributable to plague caused thousands of deaths in Milan in the summer of 1629,  
11 a time of war and famine that immediately preceded the even more fatal Great Plague of 1630,  
12 which is estimated to have killed tens of thousands of people. The 5,993 deaths of 1629 recorded in  
13 the *Liber Mortuorum* of Milan (a city with an estimated population of 130,000 inhabitants at the  
14 time) were 45.7% more than the average number recorded between 1601 and 1628. Mortality  
15 peaked in July, and 49% of the deaths were attributed to acute fever without a rash or any organ  
16 involvement. These deaths involved 1,627 males and 1,334 females, and occurred at a median age  
17 40 years (range 0-95). In this paper, we discuss the possible cause of the epidemic, which may have  
18 been an outbreak of typhoid fever.

## 20 INTRODUCTION

21 Various historical sources indicate that thousands of deaths in Milan in 1629 were caused by  
22 a 'malignant fever' [1-6] that was attributed to a contagion imported by hungry peasants pouring  
23 into the city in a search for food [2]. In the spring of that year, people began to drop dead in the  
24 street, "some with roots of herbs, others with bran in their mouths" [2]. From the end of May, all  
25 beggars were confined to the Lazaretto of St. Gregory, although this was against the advice of the  
26 *Magistrato di Sanità* (the government authority responsible for public health) [7], which feared it  
27 could generate a contagious focus [2]. Mortality in the Lazaretto rapidly increased, and soon  
28 reached an average of 70-80 deaths per day [8]. In June, all of the less debilitated inmates were  
29 discharged and, according to the contemporary physician and chronicler Alessandro Tadino [2], the  
30 disease soon spread throughout the city ("*si comunicò il male*"). In a handwritten note of 1632,  
31 another contemporary physician, Senatore Settala, called the disease "... *quel morbino di San*  
32 *Gregorio ... che è non solo febre maligna ma pestilentiale et attacicia et quasi peste* (i.e. "that  
33 little *morbis* of St. Gregory, which is not only a malignant fever but pestilential, contagious, and  
34 almost like a plague)" [9]. According to Tadino, there were 8,750 deaths in Milan between January  
35 and August 1629 [2], a figure that was substantially confirmed by the Resident of the Grand Duchy  
36 of Tuscany, who wrote in July that "seven thousand souls have died here since January, mostly  
37 people of low rank" [6]. Moreover, the Resident of the Republic of Venice sent a dispatch to the  
38 *Serenissima* on 1 August in which he claimed that the number of deaths was as high as 14,000 in  
39 just two months [10].

40 The terrible Great Plague that occurred in Milan just a few months later in 1630 has almost  
41 erased the memory of the previous summer's epidemic, the cause of which remains unknown. The  
42 aim of this study was to analyse the deaths listed in 1629 in the Milan's *Mortuorum libri* (MML), a  
43 series of registers indicating the causes of deaths in the city that was started in 1450 and is one of

## Milan's fever epidemic of summer 1629

44 the oldest and most complete systematic collections of public health data in pre-industrial Europe  
45 [11].

### 46 **METHODS**

47 The MML of 1629 was consulted at the *Archivio di Stato* in Milan [12], and used to  
48 construct a database containing the demographic data of the deceased (name, surname, age, gender,  
49 titles or social status) and the main cause of death and other contributing illnesses as described by  
50 the city's appointed medical officers. The monthly number of deaths in 1629 was compared with  
51 that during the period 1601-1628 as reported in Giuseppe Ferrario's 1840 list of the total of all of  
52 the deaths recorded in the MML each year by calendar month [13]. The distribution of the deceased  
53 by age and gender was compared using the Kolmogorov-Smirnov test.

54 Sennert's 1608 treatise [14] was used as a reference to interpret the meaning attributed to the  
55 different types of fever associated with the deaths by the drafters of the certificates. Accordingly,  
56 deaths due to fever or in which fever was involved were categorised as followed: a) fever without a  
57 description of organ involvement; b) fever associated with gastrointestinal symptoms; c) fever  
58 associated with respiratory symptoms; d) fever with rash; and e) *febre etica*, a term describing the  
59 chronic/long-lasting fever often associated with phthisis or long-lasting/debilitating diseases [14].

60 The deaths attributed to *epilepsia*, a term that may have been used to describe infantile  
61 febrile convulsions or infantile weakness without any associated fever, epilepsy or epileptic disease  
62 in people of any age were not included in the analysis of deaths caused by febrile illness.

63 The weekly number of the deaths due to fever was recorded, as were the personal data of the  
64 people whose deaths were attributed to the different types of fever (age, sex, and the number of  
65 days between symptom onset and death when available), and the name and professional position  
66 (non-graduate surgeon or graduate doctor) of the health officer certifying each death.

67 Finally, the chi-squared test was used to compare the percentage of deaths due to fever  
68 without organ involvement in males and females stratified by age.

69

## 70 **RESULTS**

71 The 1629 MML lists 5,997 cases of death but, as four proved to be duplicates or erroneous  
72 transcriptions, the actual number was 5,993, of which 211 were recorded in the city's three prisons  
73 and 171 involved beggars found dead in the street. Most of the entries (71%) were made by two  
74 *cerusici* (non-graduate surgeons) specifically appointed to inspect corpses; the others were written  
75 by 33 *physici collegiati* (graduate doctors). The number of deaths recorded in 1629 was 45.7%  
76 higher than the 4,113 annual average number in the period 1601-1628 and, in comparison with this,  
77 the excess deaths occurring in 1629 started in May and peaked in July (Fig. 1).

78 The deceased included 3,072 males and 2,788 females; gender could not be deduced in 133  
79 cases (2.2%), mainly involving people found dead in the street whose name was unknown. Their  
80 median age at the time of death was 40 years (range 0-107); this information was not available in  
81 200 cases (3.3%). As shown in Figure 2, there were no significant differences in the distribution of  
82 deaths by gender or age group.

83 A total of 3,363 deaths were attributed to, or associated with fever. Table 1, panel A, shows  
84 the number of deaths attributed to different patterns of fever. Fever without a description of organ  
85 involvement was the reported cause of death in 2,964 cases, and fever associated with  
86 gastrointestinal (*cum fluxo*) or respiratory symptoms (*cum catarro*) was reported in respectively 141  
87 and 144 cases. Excluding six deaths due to *variola* (smallpox) between the ages of two months and  
88 21 years, there were only 12 cases of death due to fever with rash (age range 14-65 years). The 102  
89 deaths associated with *febre etica* occurred in much younger subjects than those with the other  
90 types of fever, regardless of organ involvement, and were associated with respiratory symptoms in

## Milan's fever epidemic of summer 1629

91 five cases, two of which were also associated with hemoptysis (*cum sputo sanguinis*). *Febre etica*  
92 was also reported in the case of two deaths mainly attributed to *phtisi*.

93 The following definitions of fever without any specific reference to organ involvement were  
94 found in the MML: *febre acuta* (1,793 cases), *febre* (320), *febre longa* (315), *febre continua* (218),  
95 *febre acuta maligna* (203), *febre maligna* (74), *febre terzana* (15), *febre peracuta* (14), and *febre*  
96 *frenetica* (12) (Tab. 1, panel B). In some cases, the time interval between symptom onset and death  
97 was recorded, including 7.9% of the deaths due to *febre acuta* and 38.4% of those due to *febre*  
98 *acuta maligna*: in both cases, the median interval was  $\leq 10$  days. The *cerusici* and *phisici collegiati*  
99 tended to use different terms to describe the type of fever. The deaths due to *febre longa* (long  
100 fever) or *febre* without any other specification were prevalently recorded by *cerusici*, and all of the  
101 diagnoses of *febre frenetica* were formulated by only one of the two *cerusici*. All of the diagnoses  
102 of *febre peracuta* were made by *phisici collegiati* (all but one by the same doctor) and, although  
103 they made only about 40% of the diagnoses of death due to fever without organ involvement,  
104 *phisici collegiati* made 60% of the diagnoses of *febre continua*.

105 Figure 3 shows the weekly distribution of deaths associated with the different patterns of  
106 fever. The number of deaths attributed to fever without any reported organ involvement began to  
107 increase in week 19 of 1629, and peaked in week 29; the number of deaths due to fever with  
108 gastrointestinal symptoms showed a similar temporal trend, whereas those due to fever with  
109 respiratory symptoms were more evenly distributed throughout the year. One hundred and forty-  
110 four (84.2%) of the 171 deaths of beggars found dead in the street were recorded between week 24  
111 and week 28 (from mid-June to mid- July), and the entries covering the deaths of 128 included up to  
112 seven people at a time, without any indication of their age, sex or cause of death.

113 The distribution of deaths due to different types of fever without any description of organ  
114 involvement was substantially comparable, with most of the deaths being recorded during the

## Milan's fever epidemic of summer 1629

115 summer months (Supp. Fig. 1); however, the distribution of the deaths associated with *febre etica*  
116 was not seasonal.

117 Figure 4 shows the number and percentage of deaths due to fever without any organ  
118 involvement in males and females stratified by age. The deaths were relatively more frequent in  
119 males (53% vs 47.8%;  $p < 0.001$ ), particularly in the stratum 41-45 years (67.3% vs 54.8%;  $p = 0.01$ ).

120

### 121 **DISCUSSION**

122 The available data show that Milan was hit by a major epidemic in the summer of 1629 that  
123 caused a 60% increase in the number of recorded deaths in comparison with 1628. The officially  
124 recorded deaths of 171 beggars (2.9% of the total for the year) are not enough to explain the extent  
125 of this increase and, given that the number of deaths estimated by the chroniclers of the time is  
126 much larger than that recorded in the MML, it is unlikely that the number of unrecorded deaths in  
127 lazarettos and hospitals would be enough to make up the difference. It is therefore likely that the  
128 deaths caused by the *morbino* were perceived as being more numerous than they actually were.

129 Although the chroniclers emphasised the role of migrants in spreading the epidemic, the  
130 increase in the number of incident cases of death due to fever started in week 19, and more than  
131 80% of the deaths of beggars found dead in the street were recorded between week 24 and week 28,  
132 presumably after their release from the lazaretto of St. Gregory: it is also interesting to note that the  
133 MML describes such beggars as 'those of St. Gregory' (*ex illis Sancti Gregorii*) only from the  
134 second half of June.

135 The terms used to define the different types of fever retained the classification based on the  
136 theory of humours in only a minority of cases, and only two of the four types of putrid fever  
137 contemplated by Galen [15] (*febre continua*, the cause of which is attributed to a blood alteration,  
138 and *febre terzana*, attributed to a bile alteration) are recorded as being associated with the deaths  
139 that occurred in 1629. The use of these terms implies an effort to describe the symptom and

## Milan's fever epidemic of summer 1629

140 pathogenesis of the disease causing the deaths, and so it is not surprising that *febre continua* was  
141 more frequently used by the *physici collegiati* than the two *cerusici*. However, neither of these types  
142 of fever differ from the other types of acute fever in terms of their distribution between the sexes  
143 and seasonality, the median age of the subjects at the time of death, or (when this information was  
144 available), the duration of the symptom before death.

145 On the contrary, *febre etica* did not seem to be seasonal and, in comparison with the other  
146 types of fever, appeared at a much younger age and a longer time before death. The cases associated  
147 with phthisis or respiratory symptoms *cum sputo sanguinis* suggest a diagnosis of pulmonary  
148 tuberculosis. In his 1619 treatise on fevers, Sennert [14] described its long-lasting nature (“*in quibus*  
149 *intemperies febrilis quasi in habitum transivit*”: Book III, Chap. I, page 333) and its association  
150 with phthisis (“*sæpissime febris talis excitatur ex pulmonum ulcere in phthisicis, qua vulgo plerique*  
151 *hecticam vocant*”: Book II, Chap. XVI, page 208), and it is likely that the use of the term *febre*  
152 *etica* by Milanese public health officers in 1629 was in line with this medical tradition.

153 *Febre longa* was probably a diagnosis of convenience used (mainly by the two *cerusici*) to  
154 reinforce the exclusion of plague, which was believed to be fatal in a matter of days (Sennert, Book  
155 IV, Chap. IV, page. 421). Nevertheless, the deaths due to *febre longa* occurred at a similar median  
156 age and had a seasonal peak that similar to that of the large group of acute fevers without organ  
157 involvement that caused most of the deaths in 1629. We have therefore included these cases in our  
158 analysis of deaths due to fever without organ involvement as a possible part of the epidemic.

159 Seventeenth century medical science certainly knew of the existence of malignant or  
160 pestilential fevers other than the plague (Sennert, Book IV, Chap.VII, pages 478-484), although  
161 there was much discussion about their nature, and it is clear that the Milanese public health officers  
162 chose the terms used in their contemporary medicine to indicate the presence of an epidemic fever



## Milan's fever epidemic of summer 1629

163 that was less severe and less lethal than the plague. The most correct and complete formulation  
164 would have been *febre acuta maligna*, which was used almost exclusively by the *physici collegiati*.  
165 The first reported cases of the plague in Milan appeared in October 1629 [1], and it was unlikely  
166 that the presence of a large plague epidemic could be hidden for long, particularly from the  
167 watchful eyes of the Residents of the other Italian States. Moreover, the *Protofisico Generale* (Chief  
168 Physician) of the Duchy of Milan, Lodovico Settala, had published a treatise on plague in 1622  
169 based on his experience of the 1576 epidemic [16], and many of the city's public health personnel  
170 were experienced in its empirical diagnosis [17]. Taken together, this seems to be sufficient to  
171 affirm that Milan's public health authorities were more than capable of recognising a case of  
172 plague, and that the *morbino* of Senatore Settala was something else.

173         Except for the six cases attributable to smallpox, the MML rarely recorded rash or other  
174 cutaneous manifestations, which strongly suggests that the *morbino* was not the epidemic typhus of  
175 which a number of episodes had occurred in Milan since the fifteenth century [18]. Epidemic typhus  
176 was described and distinguished from plague by Fracastoro [19], who confirmed its exanthematous  
177 nature in 1547 [4]; furthermore, as a large outbreak had occurred in Florence in the winter of 1621  
178 [20], it can be assumed that Milan's public health officers would have easily recognised it. Finally,  
179 epidemic typhus is more frequent during the winter, when heavy clothing favours the proliferation  
180 of lice and the transmission of *Rickettsia prowazekii* [21,22], whereas the *morbino* was a summer  
181 epidemic.

182         The number of deaths reported in Milan between 1601 and 1629 was always higher in the  
183 summer [13] and, in 1629, their number increased at the end of May and reached a peak in July. In  
184 many ways, it seems that the *morbino* may have been an enteric fever, most probably typhoid fever  
185 which, although typically food- or water-borne, can also be transmitted by inter-human contacts  
186 [23]. The recurrent excess of registered deaths in Milan during the summer of every year from 1601

## Milan's fever epidemic of summer 1629

187 [13] suggests that enteric fevers were endemic, and that more or less extensive outbreaks occurred  
188 depending on the weather or other favouring events. The population maintenance of *Salmonella*  
189 *enterica* serotype Typhi (which was responsible for 76.3% of the enteric fevers reported worldwide  
190 in 2017) [24] is guaranteed by chronic carriers, who represent approximately 2-5% of the typhoid  
191 patients who fail to clear the infection fully within one year of recovery [25]. It is worth  
192 remembering that the first anatomical description of the ileus lesions later identified as being  
193 attributable to typhoid fever was made by Spigelius in 1624, when he was Professor of Anatomy at  
194 the University of Padua [26]. Males are more susceptible to typhoid fever and at greater risk of  
195 typhoid ileal perforation [27, 28], which may explain the higher rate of deaths attributed to fever  
196 without any indication of organ involvement among males in Milan in 1629.

197         Seventeenth century Milan was intersected by numerous canals, had a rich and easily  
198 accessible groundwater table, and its drinking water came from thousands of private household  
199 wells that were often dangerously close to cesspits containing the excreta of its inhabitants [29].

200         Poor sanitation and water supplies are still the main causes of enteric fever throughout the  
201 world, and accounted for more than 14 million cases in 2017 [24]. In the pre-antibiotic era, the  
202 lethality of typhoid fever was more than 10% [30], and mortality rates of as high as 30-50% have  
203 been reported in countries in which severe typhoid fever is endemic, such as Papua New Guinea  
204 and Indonesia [31]. It should also be noted that health and social welfare conditions were  
205 dramatically compromised in Milan in 1629, as is borne out by the 118 residents recorded in the  
206 register as dying of starvation.

207         This study has a number of limitations in addition to those due to the inevitable difficulties  
208 involved when trying to attribute a cause to an epidemic solely on the basis of written documents  
209 and without any investigation in human remains. The first is the lack of information concerning the  
210 deaths occurring in the Lazaretto and other hospitals. Secondly, it was impossible to assess the

## Milan's fever epidemic of summer 1629

211 fever-related deaths occurring during childhood because of the widespread use of the convenient  
212 diagnosis of *epilepsia* in 340 cases among those aged less than eight years. The physicians of the  
213 time used the term *epilepsia* to refer to infantile weakness not necessarily accompanied by febrile  
214 convulsions [32], and it was frequently used in this sense in the MML as it was a generic diagnosis  
215 that was sufficient to rule out the suspicion of plague. Thirdly, the cause of death could not always  
216 be interpreted because the available information was insufficient. Finally, the lack of information  
217 concerning all of the deaths that occurred in the city and the precise number of inhabitants at the  
218 time of the epidemic prevents any estimate of mortality in general and by specific cause. However,  
219 given that the available estimates indicate a total population of about 130,000 inhabitants [33] and a  
220 of typhoid fever lethality rate about 10% [30], it could be supposed that no less than 30,000 people  
221 (more or less a quarter of the population) have been affected by the disease, enough to justify the  
222 alarm raised.

223 In conclusion, a serious epidemic probably due to enteric fever (possibly typhoid fever)  
224 occurred in Milan during the summer of 1629, and was favoured by the poor economic and  
225 nutritional conditions of a significant proportion of the population. It is possible that the  
226 concomitant existence of famine, war, and the arrival of many impoverished peasants from the  
227 surrounding countryside caused an extensive epidemic, thus drawing particular attention to a  
228 phenomenon that was not unusual and had been largely ignored in previous years. Subsequently, the  
229 arrival of the Great Plague of 1630, which is estimated to have caused tens of thousands of deaths,  
230 almost completely erased all memory of the *morbino* of 1629.

231

### 232 **Author Contribution**

233 Conceptualization: Massimo Galli, Folco Vaglienti, Spinello Antinori

234 Data curation: Angelo Formenti, Anna Lisa Ridolfo, Letizia Oreni, Massimo Galli

235 Formal analysis: Letizia Oreni, Elia Biganzoli, Patrizia Boracchi, Ester Luconi

## Milan's fever epidemic of summer 1629

- 236 Investigation: Massimo Galli, Anna Lisa Ridolfo, Letizia Oreni
- 237 Methodology: Massimo Galli, Letizia Oreni, Elia Biganzoli
- 238 Validation: Massimo Galli, Letizia Oreni, Elia Biganzoli
- 239 Visualization: Letizia Oreni, Anna Lisa Ridolfo
- 240 Writing-original draft: Massimo Galli, Anna Lisa Ridolfo
- 241 Writing-review & editing: Massimo Galli, Anna Lisa Ridolfo, Spinello Antinori

243 **REFERENCES**

- 244 1. Ripamonti G. *De peste quae fuit anno 1630*. Malatesta, Milan, 1641. Pirotta 1841, page  
245 15
- 246 2. Tadino A. *Raguaglio dell'origine et giornali successi della gran peste contagiosa,*  
247 *venefica, et malefica seguita nella città di Milano, et suo ducato dall'anno 1629 fino*  
248 *all'anno 1632*. Bidelli, Milan, 1648. pages 8-11
- 249 3. Borromeo F. *De pestilentia quae Mediolani anno 1630 magnam stragem edidit*.  
250 Rusconi, Milan, 1987 (Italian translation), pages 45-47.
- 251 4. Corradi A. *Annali delle epidemie occorse in Italia dalle prime memorie fino al 1850*.  
252 Gamberini and Parmeggiani, Bologna, 1865. Vol. III, pages 59-60.
- 253 5. Marioni PA. Dispatch of 19 May 1629. In Cantù C: *Scorsa d'un lombardo negli archivj*  
254 *di Venezia*. Civelli, Milan, 1856, page 50
- 255 6. Nicolini F. *Aspetti della vita italo-spagnola nel Cinque e Seicento*. Guida, Napoli, 1934,  
256 pages 224-25
- 257 7. Paccagnini E. Cronaca di un contagio. In Farinelli G, Paccagnini E. *Processo agli untori.*  
258 *Milano 1630, cronaca e atti giudiziari*. Garzanti, Milano, 1988, page 12.
- 259 8. Visconti A. *Il Magistrato di sanità nello stato di Lombardia*. Archivio Storico Lombardo  
260 1911; 15 (file 30): 262-84.
- 261 9. Bendiscioli M. *Politica, amministrazione e religione nell'età dei Borromei*. In Storia di  
262 Milano, Fondazione Treccani degli Alfieri, Milan 1957. Vol. X, Photostatic copy of  
263 Senatore Settala's autograph inserted on page348.
- 264 10. Marioni PA. Dispatch of 1 August 1629. In Mutinelli F. *Storia arcana ed aneddotica*  
265 *d'Italia*. Naratovich, Venice, 1855, page 30.

Milan's fever epidemic of summer 1629

- 266 11. Vaglianti F. *“Noluit ire ad visum”*. *I segreti dei Mortuorum libri di Milano da Francesco*  
267 *Sforza a Leonardo da Vinci (1452-1485)*. In: Vaglianti F, Cattaneo C: *La popolazione di*  
268 *Milano dal Rinascimento*. Edizioni Biblioteca Francescana, Milan, 2013, pages 25-60.
- 269 12. Archivio di Stato di Milano (ASMi), *Atti di Governo, Popolazione PA*, B. 117, 1629.
- 270 13. Ferrario G. *Statistica medica di Milano. Dal secolo XV fino ai nostri giorni*. Guglielmini  
271 and Redaelli, Milan, 1840, page 375.
- 272 14. Sennert D. *De febribus Libri IV*, second edition, Wittenberg 1628.
- 273 15. Claudius Galenus, *De differentiis februm*, liber I, ed. CG Kuhn, Leipzig, 1821-33 VII,  
274 pages 282-332.
- 275 16. Settala L. *De peste, & pestiferis affectibus. Libri quinque*. GB Bidelli, Milan, 1622.
- 276 17. Vanti M. *I ministri degli infermi nella peste del 1630*. Scuola Tipografica Domenicana  
277 delle Missioni Indiane, Roma 1944.
- 278 18. Alfani G. *Il grand tour dei Cavalieri dell'Apocalisse. L'Italia del lungo cinquecento*  
279 *(1494-1629)*. Marsilio, Venice, 2010, pages 139-140.
- 280 19. Raoult D, Woodward T, Dumler JS. *The history of epidemic typhus*. *Infect Dis Clin*  
281 *North Am* 2004; 18: 127–40.
- 282 20. Cipolla CM. *Contro un nemico invisibile. Epidemie e strutture sanitarie nell'Italia del*  
283 *Rinascimento*. Il Mulino, Bologna, 1986, pages 31-48.
- 284 21. Zinsser H. *Rats, lice and history*. Little, Brown & Comp. Boston 1934, pages 166-78.
- 285 22. Bechah Y, Capo C, Mege J-L, Raoult D. *Epidemic typhus*. *Lancet Infect Dis* 2008;8:  
286 417–26.
- 287 23. Bhan MK, Bahl R, Bhatnagar S. *Typhoid and paratyphoid fever*. *Lancet* 2005; 366: 749-  
288 62.

Milan's fever epidemic of summer 1629

- 289 24. GBD 2017 Typhoid and Paratyphoid Collaborators. *The global burden of typhoid and*  
290 *paratyphoid fevers: a systematic analysis for the Global Burden of Disease Study 2017.*  
291 *Lancet Infect Dis.* 2019; 19: 369-381.
- 292 25. Gunn JS, Marshall JM, Baker S, Dongol S, Charles RC, Ryan ET. *Salmonella chronic*  
293 *carriage: epidemiology, diagnosis, and gallbladder persistence.* *Trends Microbiol.*  
294 2014; 22: 648-55.
- 295 26. van den Spiegel A. *De semitertiana libri quatuor.* Apud haeredes J Theodori de Bry,  
296 1624, page 129.
- 297 27. Vázquez-Martínez ER, García-Gómez E, Camacho-Arroyo I, González-Pedrajo B.  
298 *Sexual dimorphism in bacterial infections.* *Biol Sex Differ.* 2018; 9: 27.
- 299 28. Khan M. *A plausible explanation for male dominance in typhoid ileal perforation.* *Clin*  
300 *Exp Gastroenterol.* 2012; 5: 213-7.
- 301 29. Soldi Rondinini G. *Vie, piazze, dimore. Aspetti dell'urbanistica di Milano medievale.* In  
302 F. Della Peruta, *Storia illustrata di Milano.* Sellino, Milan, 1992.
- 303 30. Stuart BM, Pullen RL. *Typhoid. Clinical analysis of three hundred and sixty cases.* *Arch*  
304 *Intern Med* 1946, 78: 629-61.
- 305 31. Rogerson SJ, Spooner VJ, Smith TA, Richens J. *Hydrocortisone in chloramphenicol-*  
306 *treated severe typhoid fever in Papua New Guinea.* *Trans R Soc Trop Med Hyg* 1991;  
307 85: 113–16.
- 308 32. Alsario Della Croce V. *De epilepsia seu comitiali morbo.* Venezia, Apud Danielem  
309 Zanettum, 1603, Liber II, page 57.
- 310 33. Sella, D. “La popolazione di Milano nei secoli XVI e XVII,” in *Storia di Milano,*  
311 *Fondazione Treccani degli Alfieri, Milan 1957. Vol. XII, page 464.*
- 312

## Milan's fever epidemic of summer 1629

### 313 **Acknowledgements**

314 This study was supported by the *Gruppo Italiano per lo Studio della Storia Evolutiva e Sociale*  
315 *delle Malattie Infettive* (GISSEMI) and the Italian Society of Infectious and Tropical Diseases  
316 (SIMIT).  
317 The authors received no financial support for the research.



318 **Table 1. Characteristics of the deaths attributed to different patterns of fever (panel A), and different types of fever without any specific**  
 319 **reference to organ involvement (panel B).**  
 320

| Panel A                                         |                   |             |             |                |                                   |                |
|-------------------------------------------------|-------------------|-------------|-------------|----------------|-----------------------------------|----------------|
| Described patterns of fever                     | No.               | Sex, n (%)  |             | Age, years     | Days from symptoms onset to death |                |
|                                                 |                   | Males       | Females     | Median (range) | n. of cases                       | Median (range) |
| Fever without any described organ involvement   | 2964 <sup>‡</sup> | 1627 (54.9) | 1334 (45.1) | 40 (0-95)      | 260                               | 10 (1-181)     |
| Fever associated with gastrointestinal symptoms | 141               | 78 (55.3)   | 63 (44.7)   | 50 (2-90)      | 13                                | 14 (3-181)     |
| Fever associated with respiratory symptoms      | 144               | 70 (48.6)   | 74 (51.4)   | 60 (1-95)      | 10                                | 7 (3-30)       |
| <i>Febre etica</i> <sup>◇</sup>                 | 102               | 44 (43.1)   | 58 (56.9)   | 20 (2-74)      | 6                                 | 151 (91-181)   |
| Fever with rash                                 | 12                | 7 (58.3)    | 5 (41.7)    | 41 (14-65)     | -                                 | -              |

<sup>‡</sup>Gender missing in three cases. <sup>◇</sup>Definition referring to fever associated with phthisis or chronic debilitating diseases (ref. 14)

321

| Panel B                                                          |                          |                   |                     |                              |                                        |                            |                                         |                |
|------------------------------------------------------------------|--------------------------|-------------------|---------------------|------------------------------|----------------------------------------|----------------------------|-----------------------------------------|----------------|
| Different types of fever without any described organ involvement | No. (%)<br>(n=2964)      | Sex, No. (%)      |                     | Age, years<br>Median (range) | Certifier of death, No. (%)            |                            | No. of days from symptom onset to death |                |
|                                                                  |                          | Males<br>(n=1627) | Females<br>(n=1334) |                              | <i>Cerusici collegiati</i><br>(n=1766) | <i>Physici</i><br>(n=1197) | No. of cases                            | Median (range) |
| <i>Febre acuta</i>                                               | 1793 (60.5) <sup>‡</sup> | 976 (60.0)        | 814 (61.0)          | 40 (0-95)                    | 1091 (61.8)                            | 702 (58.6)                 | 142                                     | 10 (2-30)      |
| <i>Febre</i>                                                     | 320 (10.8)               | 176 (10.8)        | 144 (10.8)          | 30 (0-90)                    | 222 (12.6)**                           | 98 (8.2)                   | 2                                       | 11 (8-14)      |
| <i>Febre longa</i>                                               | 315 (10.6)               | 151 (9.3)         | 164 (12.3)*         | 35 (1-90)                    | 287 (16.3)***                          | 28 (2.3)                   | 2                                       | 121 (60-181)   |
| <i>Febre continua</i>                                            | 218 (7.4) <sup>§</sup>   | 119 (7.3)         | 99 (7.4)            | 48 (0-90)                    | 86 (4.9)***                            | 131 (10.9)                 | 27                                      | 10 (3-24)      |
| <i>Febre acuta maligna</i>                                       | 203 (6.8)                | 133 (8.2)         | 70 (5.2)*           | 45 (4-93)                    | 7 (0.4)***                             | 196 (16.4)                 | 78                                      | 9 (3-20)       |
| <i>Febre maligna</i>                                             | 74 (2.5)                 | 47 (2.8)          | 27 (2.0)            | 40 (5-70)                    | 55 (3.1)*                              | 19 (1.6)                   | 7                                       | 7 (4-15)       |
| <i>Febre terzana</i>                                             | 15 (0.5)                 | 8 (0.5)           | 7 (0.5)             | 60 (21-75)                   | 6 (0.3)                                | 9 (0.8)                    | 2                                       | 37 (14-60)     |
| <i>Febre peracuta</i>                                            | 14 (0.5)                 | 9 (0.6)           | 5 (0.4)             | 49 (25-70)                   | 0 (0)***                               | 14 (1.2)                   | -                                       | -              |
| <i>Febre frenetica</i>                                           | 12 (0.4)                 | 8 (0.5)           | 4 (0.3)             | 30 (20-70)                   | 12 (0.7)*                              | 0 (0)                      | -                                       | -              |

<sup>‡</sup>Gender missing in three cases. <sup>§</sup>Certifier missing in one case. \*p-value <0.05; \*\*p-value <0.001; \*\*\*p-value <0.0001

## Milan's fever epidemic of summer 1629

323

### 324 **FIGURE LEGENDS**

325 Fig. 1: The number of deaths recorded in Milan's *Liber Mortuorum* for each month of 1629, and the  
326 mean (min-max) monthly number of deaths in the period 1601- 1628.

327 Fig. 2: Deaths recorded in 1629, stratified by gender and age group at the time of death (age not  
328 available in 200 cases).

329 Fig. 3: Weekly distribution of the deaths attributed to fever without any described organ  
330 involvement in comparison with the distribution of deaths due to fever with gastrointestinal  
331 symptoms, fever with respiratory symptoms, and *febre etica*.

332 Fig. 4: Number and percentage of deaths due to fever without any described organ involvement,  
333 stratified by gender and age.

334 Supplementary Figure 1. Monthly distribution of deaths due to the different types of fever.

Figure 1

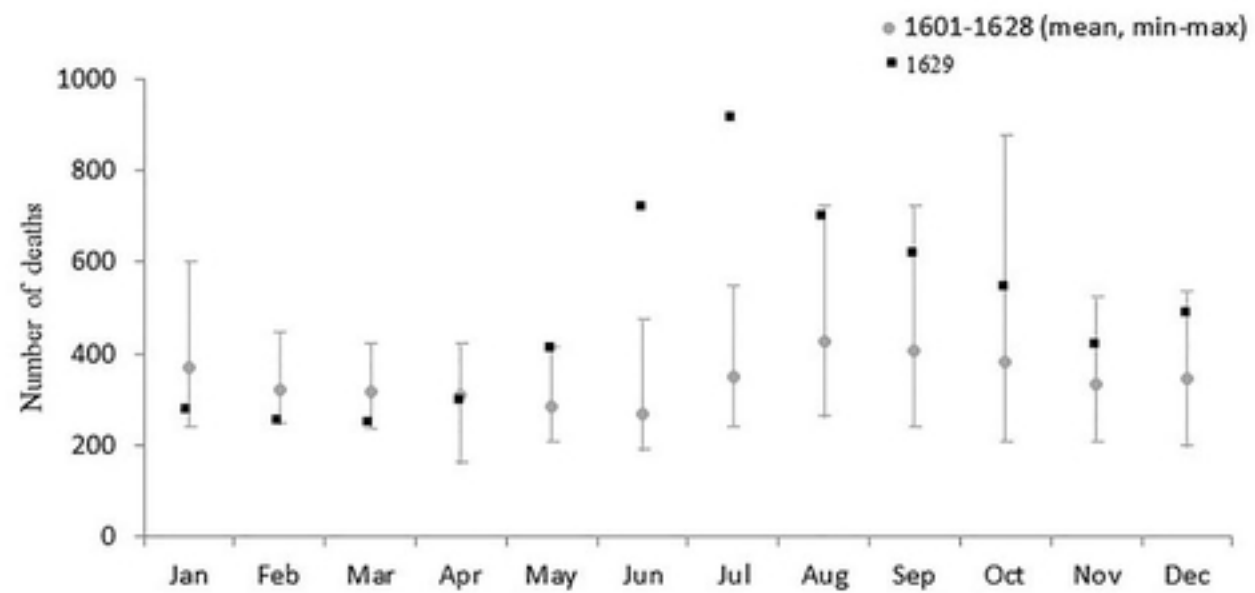

Figure 1

Figure 2

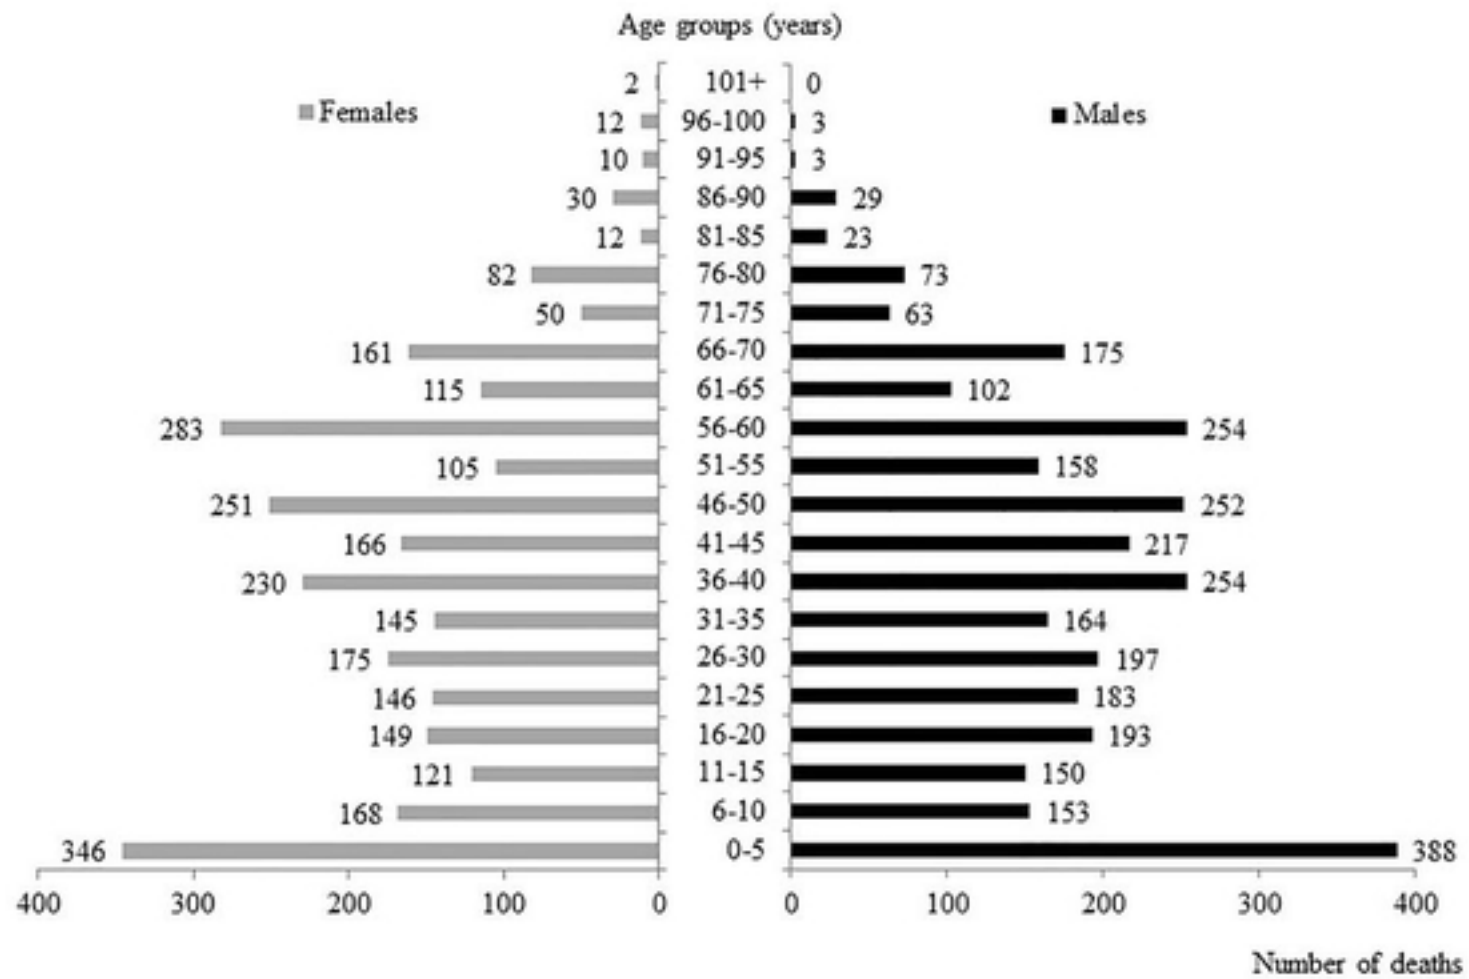

Figure 2

Figure 3

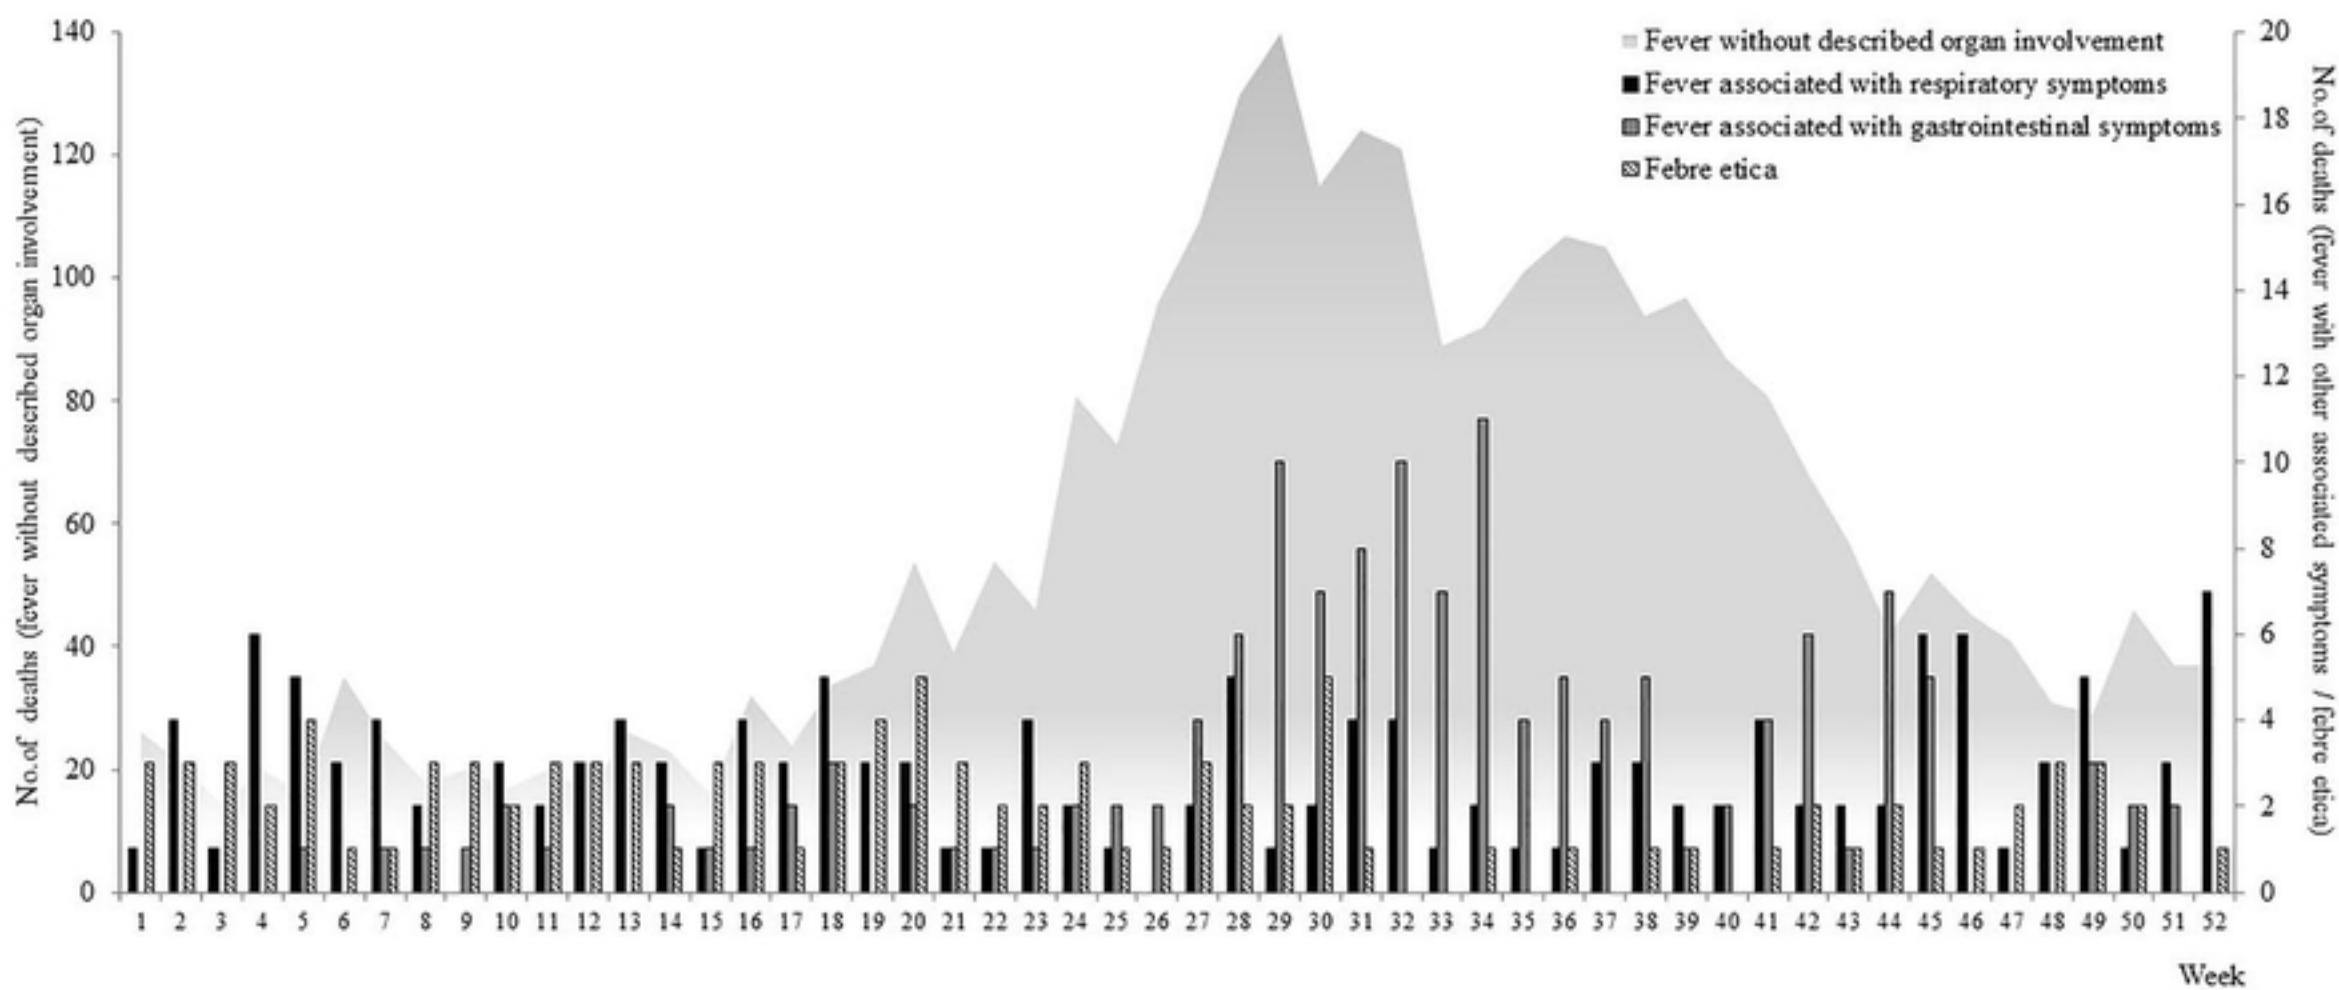

Figure 3

Figure 4

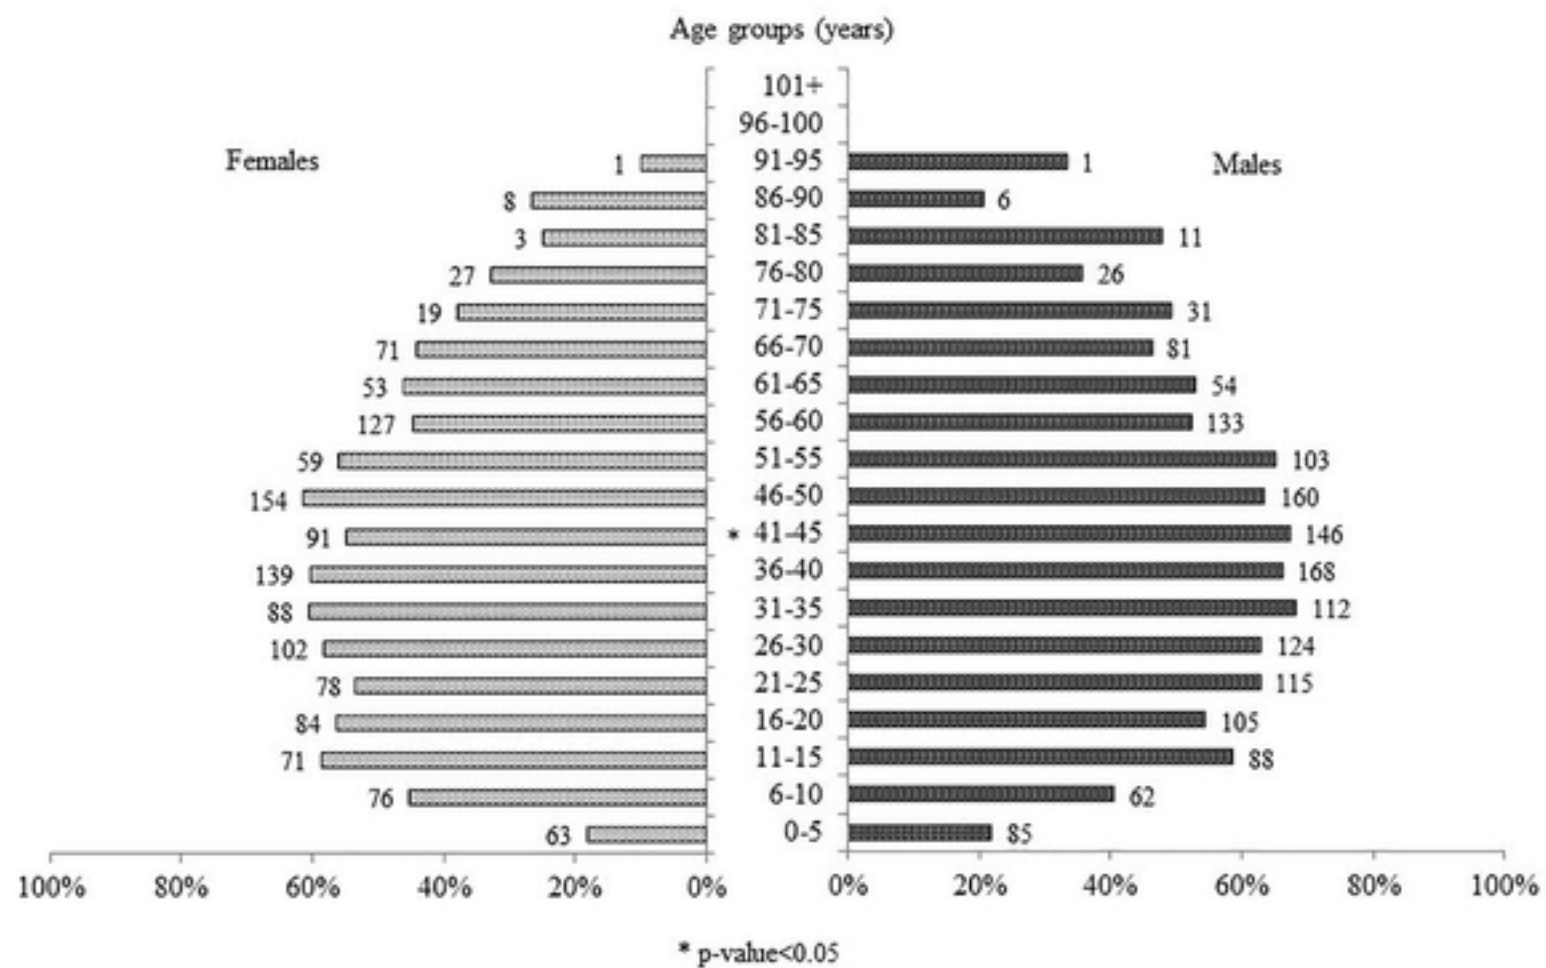

Figure 4
