## Milan's fever epidemic of summer 1629

# 1 MILAN'S FORGOTTEN EPIDEMIC OF SUMMER 1629, A FEW MONTHS BEFORE 2 THE LAST GREAT PLAGUE: AN INVESTIGATION INTO THE POSSIBLE CAUSE.

3 Massimo Galli<sup>1</sup>, Letizia Oreni<sup>1</sup>, Anna Lisa Ridolfo<sup>1</sup>, Angelo Formenti<sup>1</sup>, Ester Luconi<sup>2</sup>, Patrizia  
4 Boracchi<sup>2</sup>, Spinello Antinori<sup>1</sup>, Elia Biganzoli<sup>2</sup>, Folco Vaglianti<sup>3</sup>.

<sup>1</sup>Unit of Infectious Diseases, Luigi Sacco Department of Biomedical and Clinical Sciences Luigi Sacco, Università degli Studi di Milano, Milan, Italy; <sup>2</sup>Giulio A. Maccacaro Unit of Medical Statistics, Biometry and Bioinformatics, Department of Clinical Sciences and Community Health & DSRC, Università degli Studi di Milano, Milan, Italy; <sup>3</sup>Department of History and Historical Documentation Sciences, Università degli Studi di Milano, Milan, Italy

5 **Key words:** old epidemics; plague; typhoid fever

6 **Short title:** Milan's fever epidemic of summer 1629

7 **World count:** 3125

8

### Correspondence to:

Prof. Massimo Galli,

Luigi Sacco Department of Biomedical and Clinical Sciences,

Università degli Studi di Milano

Via GB Grassi 74, 20157 Milano, Italy

Tel. +3902390451; Fax: +390250319758

e-mail: [massimo.galli@unimi.it](mailto:massimo.galli@unimi.it)

## Milan's fever epidemic of summer 1629

### 9 ABSTRACT

10 An epidemic not attributable to plague caused thousands of deaths in Milan in the summer of 1629,  
 11 a time of war and famine that immediately preceded the even more fatal Great Plague of 1630,  
 12 which is estimated to have killed tens of thousands of people. The 5,993 deaths of 1629 recorded in  
 13 the *Liber Mortuorum* of Milan (a city with an estimated population of 130,000 inhabitants at the  
 14 time) were 45.7% more than the average number recorded between 1601 and 1628. Mortality  
 15 peaked in July, and 49% of the deaths were attributed to acute fever without a rash or any organ  
 16 involvement. These deaths involved 1,627 males and 1,334 females, and occurred at a median age  
 17 40 years (range 0-95). In this paper, we discuss the possible cause of the epidemic, which may have  
 18 been an outbreak of typhoid fever.

## Milan's fever epidemic of summer 1629

### 20 INTRODUCTION

21 Various historical sources indicate that thousands of deaths in Milan in 1629 were caused by  
 22 a 'malignant fever' [1-6] that was attributed it to a contagion imported by hungry peasants pouring  
 23 into the city in a search for food [2]. In the spring of that year, people began to drop dead in the  
 24 street, "some with roots of herbs, others with bran in their mouths" [2]. From the end of May, all  
 25 beggars were confined to the Lazaretto of St. Gregory, although this was against the advice of the  
 26 *Magistrato di Sanità* (the government authority responsible for public health) [7], which feared it  
 27 could generate a contagious focus [2]. Mortality in the Lazaretto rapidly increased, and soon  
 28 reached an average of 70-80 deaths per day [8]. In June, all of the less debilitated inmates were  
 29 discharged and, according to the contemporary physician and chronicler Alessandro Tadino [2], the  
 30 disease soon spread throughout the city ("*si comunicò il male*"). In a handwritten note of 1632,  
 31 another contemporary physician, Senatore Settala, called the disease "... *quel morbino di San*  
 32 *Gregorio ... che è non solo febre maligna ma pestilentiale et attacaticia et quasi peste* (i.e. "that  
 33 little *morbis* of St. Gregory, which is not only a malignant fever but pestilential, contagious, and  
 34 almost like a plague)" [9]. According to Tadino, there were 8,750 deaths in Milan between January  
 35 and August 1629 [2], a figure that was substantially confirmed by the Resident of the Grand Duchy  
 36 of Tuscany, who wrote in July that "seven thousand souls have died here since January, mostly  
 37 people of low rank" [6]. Moreover, the Resident of the Republic of Venice sent a dispatch to the  
 38 *Serenissima* on 1 August in which he claimed that the number of deaths was as high as 14,000 in  
 39 just two months [10].

40 The terrible Great Plague that occurred in Milan just a few months later in 1630 has almost  
 41 erased the memory of the previous summer's epidemic, the cause of which remains unknown. The  
 42 aim of this study was to analyse the deaths listed in 1629 in the Milan's *Mortuorum libri* (MML), a  
 43 series of registers indicating the causes of deaths in the city that was started in 1450 and is one of

## Milan's fever epidemic of summer 1629

the oldest and most complete systematic collections of public health data in pre-industrial Europe [11].

### METHODS

The MML of 1629 was consulted at the *Archivio di Stato* in Milan [12], and used to construct a database containing the demographic data of the deceased (name, surname, age, gender, titles or social status) and the main cause of death and other contributing illnesses as described by the city's appointed medical officers. The monthly number of deaths in 1629 was compared with that during the period 1601-1628 as reported in Giuseppe Ferrario's 1840 list of the total of all of the deaths recorded in the MML each year by calendar month [13]. The distribution of the deceased by age and gender was compared using the Kolmogorov-Smirnov test.

Sennert's 1608 treatise [14] was used as a reference to interpret the meaning attributed to the different types of fever associated with the deaths by the drafters of the certificates. Accordingly, deaths due to fever or in which fever was involved were categorised as followed: a) fever without a description of organ involvement; b) fever associated with gastrointestinal symptoms; c) fever associated with respiratory symptoms; d) fever with rash; and e) *febre etica*, a term describing the chronic/long-lasting fever often associated with phthisis or long-lasting/debilitating diseases [14].

The deaths attributed to *epilepsia*, a term that may have been used to describe infantile febrile convulsions or infantile weakness without any associated fever, epilepsy or epileptic disease in people of any age were not included in the analysis of deaths caused by febrile illness.

The weekly number of the deaths due to fever was recorded, as were the personal data of the people whose deaths were attributed to the different types of fever (age, sex, and the number of days between symptom onset and death when available), and the name and professional position (non-graduate surgeon or graduate doctor) of the health officer certifying each death.

## Milan's fever epidemic of summer 1629

Finally, the chi-squared test was used to compare the percentage of deaths due to fever without organ involvement in males and females stratified by age.

## RESULTS

The 1629 MML lists 5,997 cases of death but, as four proved to be duplicates or erroneous transcriptions, the actual number was 5,993, of which 211 were recorded in the city's three prisons and 171 involved beggars found dead in the street. Most of the entries (71%) were made by two *cerusici* (non-graduate surgeons) specifically appointed to inspect corpses; the others were written by 33 *physici collegiati* (graduate doctors). The number of deaths recorded in 1629 was 45.7% higher than the 4,113 annual average number in the period 1601-1628 and, in comparison with this, the excess deaths occurring in 1629 started in May and peaked in July (Fig. 1).

The deceased included 3,072 males and 2,788 females; gender could not be deduced in 133 cases (2.2%), mainly involving people found dead in the street whose name was unknown. Their median age at the time of death was 40 years (range 0-107); this information was not available in 200 cases (3.3%). As shown in Figure 2, there were no significant differences in the distribution of deaths by gender or age group.

A total of 3,363 deaths were attributed to, or associated with fever. Table 1, panel A, shows the number of deaths attributed to different patterns of fever. Fever without a description of organ involvement was the reported cause of death in 2,964 cases, and fever associated with gastrointestinal (*cum fluxo*) or respiratory symptoms (*cum catarro*) was reported in respectively 141 and 144 cases. Excluding six deaths due to *variola* (smallpox) between the ages of two months and 21 years, there were only 12 cases of death due to fever with rash (age range 14-65 years). The 102 deaths associated with *febre etica* occurred in much younger subjects than those with the other types of fever, regardless of organ involvement, and were associated with respiratory symptoms in

## Milan's fever epidemic of summer 1629

five cases, two of which were also associated with hemoptysis (*cum sputo sanguinis*). *Febre etica* was also reported in the case of two deaths mainly attributed to *phtisi*.

The following definitions of fever without any specific reference to organ involvement were found in the MML: *febre acuta* (1,793 cases), *febre* (320), *febre longa* (315), *febre continua* (218), *febre acuta maligna* (203), *febre maligna* (74), *febre terzana* (15), *febre peracuta* (14), and *febre frenetica* (12) (Tab. 1, panel B). In some cases, the time interval between symptom onset and death was recorded, including 7.9% of the deaths due to *febre acuta* and 38.4% of those due to *febre acuta maligna*: in both cases, the median interval was  $\leq 10$  days. The *cerusici* and *phisici collegiati* tended to use different terms to describe the type of fever. The deaths due to *febre longa* (long fever) or *febre* without any other specification were prevalently recorded by *cerusici*, and all of the diagnoses of *febre frenetica* were formulated by only one of the two *cerusici*. All of the diagnoses of *febre peracuta* were made by *phisici collegiati* (all but one by the same doctor) and, although they made only about 40% of the diagnoses of death due to fever without organ involvement, *phisici collegiati* made 60% of the diagnoses of *febre continua*.

Figure 3 shows the weekly distribution of deaths associated with the different patterns of fever. The number of deaths attributed to fever without any reported organ involvement began to increase in week 19 of 1629, and peaked in week 29; the number of deaths due to fever with gastrointestinal symptoms showed a similar temporal trend, whereas those due to fever with respiratory symptoms were more evenly distributed throughout the year. One hundred and forty-four (84.2%) of the 171 deaths of beggars found dead in the street were recorded between week 24 and week 28 (from mid-June to mid-July), and the entries covering the deaths of 128 included up to seven people at a time, without any indication of their age, sex or cause of death.

The distribution of deaths due to different types of fever without any description of organ involvement was substantially comparable, with most of the deaths being recorded during the

## Milan's fever epidemic of summer 1629

summer months (Supp. Fig. 1); however, the distribution of the deaths associated with *febre etica* was not seasonal.

Figure 4 shows the number and percentage of deaths due to fever without any organ involvement in males and females stratified by age. The deaths were relatively more frequent in males (53% vs 47.8%;  $p < 0.001$ ), particularly in the stratum 41-45 years (67.3% vs 54.8%;  $p = 0.01$ ).

## DISCUSSION

The available data show that Milan was hit by a major epidemic in the summer of 1629 that caused a 60% increase in the number of recorded deaths in comparison with 1628. The officially recorded deaths of 171 beggars (2.9% of the total for the year) are not enough to explain the extent of this increase and, given that the number of deaths estimated by the chroniclers of the time is much larger than that recorded in the MML, it is unlikely that the number of unrecorded deaths in lazarettos and hospitals would be enough to make up the difference. It is therefore likely that the deaths caused by the *morbino* were perceived as being more numerous than they actually were.

Although the chroniclers emphasised the role of migrants in spreading the epidemic, the increase in the number of incident cases of death due to fever started in week 19, and more than 80% of the deaths of beggars found dead in the street were recorded between week 24 and week 28, presumably after their release from the lazaretto of St. Gregory: it is also interesting to note that the MML describes such beggars as 'those of St. Gregory' (*ex illis Sancti Gregorii*) only from the second half of June.

The terms used to define the different types of fever retained the classification based on the theory of humours in only a minority of cases, and only two of the four types of putrid fever contemplated by Galen [15] (*febre continua*, the cause of which is attributed to a blood alteration, and *febre terzana*, attributed to a bile alteration) are recorded as being associated with the deaths that occurred in 1629. The use of these terms implies an effort to describe the symptom and

## Milan's fever epidemic of summer 1629

140 pathogenesis of the disease causing the deaths, and so it is not surprising that *febre continua* was  
 141 more frequently used by the *physici collegiati* than the two *cerusici*. However, neither of these types  
 142 of fever differ from the other types of acute fever in terms of their distribution between the sexes  
 143 and seasonality, the median age of the subjects at the time of death, or (when this information was  
 144 available), the duration of the symptom before death.

145 On the contrary, *febre etica* did not seem to be seasonal and, in comparison with the other  
 146 types of fever, appeared at a much younger age and a longer time before death. The cases associated  
 147 with phthisis or respiratory symptoms *cum sputo sanguinis* suggest a diagnosis of pulmonary  
 148 tuberculosis. In his 1619 treatise on fevers, Sennert [14] described its long-lasting nature (“*in quibus*  
 149 *intemperies febrilis quasi in habitum transivit*”: Book III, Chap. I, page 333) and its association  
 150 with phthisis (“*sæpissime febris talis excitatur ex pulmonum ulcere in phthisicis, qua vulgo plerique*  
 151 *hecticam vocant*”: Book II, Chap. XVI, page 208), and it is likely that the use of the term *febre*  
 152 *etica* by Milanese public health officers in 1629 was in line with this medical tradition.

153 *Febre longa* was probably a diagnosis of convenience used (mainly by the two *cerusici*) to  
 154 reinforce the exclusion of plague, which was believed to be fatal in a matter of days (Sennert, Book  
 155 IV, Chap. IV, page. 421). Nevertheless, the deaths due to *febre longa* occurred at a similar median  
 156 age and had a seasonal peak that similar to that of the large group of acute fevers without organ  
 157 involvement that caused most of the deaths in 1629. We have therefore included these cases in our  
 158 analysis of deaths due to fever without organ involvement as a possible part of the epidemic.

159 Seventeenth century medical science certainly knew of the existence of malignant or  
 160 pestilential fevers other than the plague (Sennert, Book IV, Chap.VII, pages 478-484), although  
 161 there was much discussion about their nature, and it is clear that the Milanese public health officers  
 162 chose the terms used in their contemporary medicine to indicate the presence of an epidemic fever



## Milan's fever epidemic of summer 1629

163 that was less severe and less lethal than the plague. The most correct and complete formulation  
 164 would have been *febre acuta maligna*, which was used almost exclusively by the *physici collegiati*.  
 165 The first reported cases of the plague in Milan appeared in October 1629 [1], and it was unlikely  
 166 that the presence of a large plague epidemic could be hidden for long, particularly from the  
 167 watchful eyes of the Residents of the other Italian States. Moreover, the *Protofisico Generale* (Chief  
 168 Physician) of the Duchy of Milan, Lodovico Settala, had published a treatise on plague in 1622  
 169 based on his experience of the 1576 epidemic [16], and many of the city's public health personnel  
 170 were experienced in its empirical diagnosis [17]. Taken together, this seems to be sufficient to  
 171 affirm that Milan's public health authorities were more than capable of recognising a case of  
 172 plague, and that the *morbino* of Senatore Settala was something else.

173 Except for the six cases attributable to smallpox, the MML rarely recorded rash or other  
 174 cutaneous manifestations, which strongly suggests that the *morbino* was not the epidemic typhus of  
 175 which a number of episodes had occurred in Milan since the fifteenth century [18]. Epidemic typhus  
 176 was described and distinguished from plague by Fracastoro [19], who confirmed its exanthematous  
 177 nature in 1547 [4]; furthermore, as a large outbreak had occurred in Florence in the winter of 1621  
 178 [20], it can be assumed that Milan's public health officers would have easily recognised it. Finally,  
 179 epidemic typhus is more frequent during the winter, when heavy clothing favours the proliferation  
 180 of lice and the transmission of *Rickettsia prowazekii* [21,22], whereas the *morbino* was a summer  
 181 epidemic.

182 The number of deaths reported in Milan between 1601 and 1629 was always higher in the  
 183 summer [13] and, in 1629, their number increased at the end of May and reached a peak in July. In  
 184 many ways, it seems that the *morbino* may have been an enteric fever, most probably typhoid fever  
 185 which, although typically food- or water-borne, can also be transmitted by inter-human contacts  
 186 [23]. The recurrent excess of registered deaths in Milan during the summer of every year from 1601

## Milan's fever epidemic of summer 1629

[13] suggests that enteric fevers were endemic, and that more or less extensive outbreaks occurred depending on the weather or other favouring events. The population maintenance of *Salmonella enterica* serotype Typhi (which was responsible for 76.3% of the enteric fevers reported worldwide in 2017) [24] is guaranteed by chronic carriers, who represent approximately 2-5% of the typhoid patients who fail to clear the infection fully within one year of recovery [25]. It is worth remembering that the first anatomical description of the ileus lesions later identified as being attributable to typhoid fever was made by Spigelius in 1624, when he was Professor of Anatomy at the University of Padua [26]. Males are more susceptible to typhoid fever and at greater risk of typhoid ileal perforation [27, 28], which may explain the higher rate of deaths attributed to fever without any indication of organ involvement among males in Milan in 1629.

Seventeenth century Milan was intersected by numerous canals, had a rich and easily accessible groundwater table, and its drinking water came from thousands of private household wells that were often dangerously close to cesspits containing the excreta of its inhabitants [29].

Poor sanitation and water supplies are still the main causes of enteric fever throughout the world, and accounted for more than 14 million cases in 2017 [24]. In the pre-antibiotic era, the lethality of typhoid fever was more than 10% [30], and mortality rates of as high as 30-50% have been reported in countries in which severe typhoid fever is endemic, such as Papua New Guinea and Indonesia [31]. It should also be noted that health and social welfare conditions were dramatically compromised in Milan in 1629, as is borne out by the 118 residents recorded in the register as dying of starvation.

This study has a number of limitations in addition to those due to the inevitable difficulties involved when trying to attribute a cause to an epidemic solely on the basis of written documents and without any investigation in human remains. The first is the lack of information concerning the deaths occurring in the Lazaretto and other hospitals. Secondly, it was impossible to assess the

## Milan's fever epidemic of summer 1629

fever-related deaths occurring during childhood because of the widespread use of the convenient diagnosis of *epilepsia* in 340 cases among those aged less than eight years. The physicians of the time used the term *epilepsia* to refer to infantile weakness not necessarily accompanied by febrile convulsions [32], and it was frequently used in this sense in the MML as it was a generic diagnosis that was sufficient to rule out the suspicion of plague. Thirdly, the cause of death could not always be interpreted because the available information was insufficient. Finally, the lack of information concerning all of the deaths that occurred in the city and the precise number of inhabitants at the time of the epidemic prevents any estimate of mortality in general and by specific cause. However, given that the available estimates indicate a total population of about 130,000 inhabitants [33] and a of typhoid fever lethality rate about 10% [30], it could be supposed that no less than 30,000 people (more or less a quarter of the population) have been affected by the disease, enough to justify the alarm raised.

In conclusion, a serious epidemic probably due to enteric fever (possibly typhoid fever) occurred in Milan during the summer of 1629, and was favoured by the poor economic and nutritional conditions of a significant proportion of the population. It is possible that the concomitant existence of famine, war, and the arrival of many impoverished peasants from the surrounding countryside caused an extensive epidemic, thus drawing particular attention to a phenomenon that was not unusual and had been largely ignored in previous years. Subsequently, the arrival of the Great Plague of 1630, which is estimated to have caused tens of thousands of deaths, almost completely erased all memory of the *morbino* of 1629.

### Author Contribution

Conceptualization: Massimo Galli, Folco Vaglienti, Spinello Antinori

Data curation: Angelo Formenti, Anna Lisa Ridolfo, Letizia Oreni, Massimo Galli

Formal analysis: Letizia Oreni, Elia Biganzoli, Patrizia Boracchi, Ester Luconi

## Milan's fever epidemic of summer 1629

- 236 Investigation: Massimo Galli, Anna Lisa Ridolfo, Letizia Oreni
- 237 Methodology: Massimo Galli, Letizia Oreni, Elia Biganzoli
- 238 Validation: Massimo Galli, Letizia Oreni, Elia Biganzoli
- 239 Visualization: Letizia Oreni, Anna Lisa Ridolfo
- 240 Writing-original draft: Massimo Galli, Anna Lisa Ridolfo
- 241 Writing-review & editing: Massimo Galli, Anna Lisa Ridolfo, Spinello Antinori

## Milan's fever epidemic of summer 1629

### REFERENCES

1. Ripamonti G. *De peste quae fuit anno 1630*. Malatesta, Milan, 1641. Pirotta 1841, page 15
2. Tadino A. *Raguaglio dell'origine et giornali successi della gran peste contagiosa, venefica, et malefica seguita nella città di Milano, et suo ducato dall'anno 1629 fino all'anno 1632*. Bidelli, Milan, 1648. pages 8-11
3. Borromeo F. *De pestilentia quae Mediolani anno 1630 magnam stragem edidit*. Rusconi, Milan, 1987 (Italian translation), pages 45-47.
4. Corradi A. *Annali delle epidemie occorse in Italia dalle prime memorie fino al 1850*. Gamberini and Parmeggiani, Bologna, 1865. Vol. III, pages 59-60.
5. Marioni PA. Dispatch of 19 May 1629. In Cantù C: *Scorsa d'un lombardo negli archivj di Venezia*. Civelli, Milan, 1856, page 50
6. Nicolini F. *Aspetti della vita italo-spagnola nel Cinque e Seicento*. Guida, Napoli, 1934, pages 224-25
7. Paccagnini E. Cronaca di un contagio. In Farinelli G, Paccagnini E. *Processo agli untori. Milano 1630, cronaca e atti giudiziari*. Garzanti, Milano, 1988, page 12.
8. Visconti A. *Il Magistrato di sanità nello stato di Lombardia*. Archivio Storico Lombardo 1911; 15 (file 30): 262-84.
9. Bendiscioli M. *Politica, amministrazione e religione nell'età dei Borromei*. In Storia di Milano, Fondazione Treccani degli Alfieri, Milan 1957. Vol. X, Photostatic copy of Senatore Settala's autograph inserted on page 348.
10. Marioni PA. Dispatch of 1 August 1629. In Mutinelli F. *Storia arcana ed aneddotica d'Italia*. Naratovich, Venice, 1855, page 30.

## Milan's fever epidemic of summer 1629

11. Vaglianti F. *"Noluit ire ad visum". I segreti dei Mortuorum libri di Milano da Francesco Sforza a Leonardo da Vinci (1452-1485)*. In: Vaglianti F, Cattaneo C: *La popolazione di Milano dal Rinascimento*. Edizioni Biblioteca Francescana, Milan, 2013, pages 25-60.
12. Archivio di Stato di Milano (ASMi), *Atti di Governo, Popolazione PA*, B. 117, 1629.
13. Ferrario G. *Statistica medica di Milano. Dal secolo XV fino ai nostri giorni*. Guglielmini and Redaelli, Milan, 1840, page 375.
14. Sennert D. *De febribus Libri IV*, second edition, Wittenberg 1628.
15. Claudius Galenus, *De differentiis febrium*, liber I, ed. CG Kuhn, Leipzig, 1821-33 VII, pages 282-332.
16. Settala L. *De peste, & pestiferis affectibus. Libri quinque*. GB Bidelli, Milan, 1622.
17. Vanti M. *I ministri degli infermi nella peste del 1630*. Scuola Tipografica Domenicana delle Missioni Indiane, Roma 1944.
18. Alfani G. *Il grand tour dei Cavalieri dell'Apocalisse. L'Italia del lungo cinquecento (1494-1629)*. Marsilio, Venice, 2010, pages 139-140.
19. Raoult D, Woodward T, Dumler JS. *The history of epidemic typhus*. Infect Dis Clin North Am 2004; 18: 127-40.
20. Cipolla CM. *Contro un nemico invisibile. Epidemie e strutture sanitarie nell'Italia del Rinascimento*. Il Mulino, Bologna, 1986, pages 31-48.
21. Zinsser H. *Rats, lice and history*. Little, Brown & Comp. Boston 1934, pages 166-78.
22. Bechah Y, Capo C, Mege J-L, Raoult D. *Epidemic typhus*. Lancet Infect Dis 2008;8: 417-26.
23. Bhan MK, Bahl R, Bhatnagar S. *Typhoid and paratyphoid fever*. Lancet 2005; 366: 749-62.

## Milan's fever epidemic of summer 1629

- 289 24. GBD 2017 Typhoid and Paratyphoid Collaborators. *The global burden of typhoid and*  
290 *paratyphoid fevers: a systematic analysis for the Global Burden of Disease Study 2017.*  
291 *Lancet Infect Dis.* 2019; 19: 369-381.
- 292 25. Gunn JS, Marshall JM, Baker S, Dongol S, Charles RC, Ryan ET. *Salmonella chronic*  
293 *carriage: epidemiology, diagnosis, and gallbladder persistence.* *Trends Microbiol.*  
294 2014; 22: 648-55.
- 295 26. van den Spiegel A. *De semitertiana libri quatuor.* Apud haeredes J Theodori de Bry,  
296 1624, page 129.
- 297 27. Vázquez-Martínez ER, García-Gómez E, Camacho-Arroyo I, González-Pedrajo B.  
298 *Sexual dimorphism in bacterial infections.* *Biol Sex Differ.* 2018; 9: 27.
- 299 28. Khan M. *A plausible explanation for male dominance in typhoid ileal perforation.* *Clin*  
300 *Exp Gastroenterol.* 2012; 5: 213-7.
- 301 29. Soldi Rondinini G. *Vie, piazze, dimore. Aspetti dell'urbanistica di Milano medievale.* In  
302 F. Della Peruta, *Storia illustrata di Milano.* Sellino, Milan, 1992.
- 303 30. Stuart BM, Pullen RL. *Typhoid. Clinical analysis of three hundred and sixty cases.* *Arch*  
304 *Intern Med* 1946, 78: 629-61.
- 305 31. Rogerson SJ, Spooner VJ, Smith TA, Richens J. *Hydrocortisone in chloramphenicol-*  
306 *treated severe typhoid fever in Papua New Guinea.* *Trans R Soc Trop Med Hyg* 1991;  
307 85: 113-16.
- 308 32. Alsario Della Croce V. *De epilepsia seu comitali morbo.* Venezia, Apud Danielelem  
309 Zanettum, 1603, Liber II, page 57.
- 310 33. Sella, D. "La popolazione di Milano nei secoli XVI e XVII," in *Storia di Milano,*  
311 *Fondazione Treccani degli Alfieri, Milan 1957. Vol. XII, page 464.*  
312

## Milan's fever epidemic of summer 1629

### 313 **Acknowledgements**

314 This study was supported by the *Gruppo Italiano per lo Studio della Storia Evolutiva e Sociale*  
 315 *delle Malattie Infettive* (GISSEMI) and the Italian Society of Infectious and Tropical Diseases  
 316 (SIMIT).  
 317 The authors received no financial support for the research.



**Table 1. Characteristics of the deaths attributed to different patterns of fever (panel A), and different types of fever without any specific reference to organ involvement (panel B).**

| Panel A                                         |                   |             |             |                |  |                                   |                |  |
|-------------------------------------------------|-------------------|-------------|-------------|----------------|--|-----------------------------------|----------------|--|
| Described patterns of fever                     | No.               | Sex, n (%)  |             | Age, years     |  | Days from symptoms onset to death |                |  |
|                                                 |                   | Males       | Females     | Median (range) |  | n. of cases                       | Median (range) |  |
| Fever without any described organ involvement   | 2964 <sup>‡</sup> | 1627 (54.9) | 1334 (45.1) | 40 (0-95)      |  | 260                               | 10 (1-181)     |  |
| Fever associated with gastrointestinal symptoms | 141               | 78 (55.3)   | 63 (44.7)   | 50 (2-90)      |  | 13                                | 14 (3-181)     |  |
| Fever associated with respiratory symptoms      | 144               | 70 (48.6)   | 74 (51.4)   | 60 (1-95)      |  | 10                                | 7 (3-30)       |  |
| <i>Febre etica</i> <sup>◇</sup>                 | 102               | 44 (43.1)   | 58 (56.9)   | 20 (2-74)      |  | 6                                 | 151 (91-181)   |  |
| Fever with rash                                 | 12                | 7 (58.3)    | 5 (41.7)    | 41 (14-65)     |  | -                                 | -              |  |

<sup>‡</sup>Gender missing in three cases. <sup>◇</sup>Definition referring to fever associated with phthisis or chronic debilitating diseases (ref. 14)

| Panel B                                                          |                          |              |                         |                              |                               |                |                                         |                |
|------------------------------------------------------------------|--------------------------|--------------|-------------------------|------------------------------|-------------------------------|----------------|-----------------------------------------|----------------|
| Different types of fever without any described organ involvement | No. (%)<br>(n=2964)      | Sex, No. (%) |                         | Age, years<br>Median (range) | Certifier of death, No. (%)   |                | No. of days from symptom onset to death |                |
|                                                                  |                          | Males        | Females                 |                              | <i>Cerusici</i>               | <i>Physici</i> |                                         |                |
|                                                                  |                          | (n=1627)     | (n=1334)                |                              | <i>collegiati</i><br>(n=1766) | (n=1197)       | No. of cases                            | Median (range) |
| <i>Febre acuta</i>                                               | 1793 (60.5) <sup>‡</sup> | 976 (60.0)   | 814 (61.0)              | 40 (0-95)                    | 1091 (61.8)                   | 702 (58.6)     | 142                                     | 10 (2-30)      |
| <i>Febre</i>                                                     | 320 (10.8)               | 176 (10.8)   | 144 (10.8)              | 30 (0-90)                    | 222 (12.6) <sup>**</sup>      | 98 (8.2)       | 2                                       | 11 (8-14)      |
| <i>Febre longa</i>                                               | 315 (10.6)               | 151 (9.3)    | 164 (12.3) <sup>*</sup> | 35 (1-90)                    | 287 (16.3) <sup>***</sup>     | 28 (2.3)       | 2                                       | 121 (60-181)   |
| <i>Febre continua</i>                                            | 218 (7.4) <sup>§</sup>   | 119 (7.3)    | 99 (7.4)                | 48 (0-90)                    | 86 (4.9) <sup>***</sup>       | 131 (10.9)     | 27                                      | 10 (3-24)      |
| <i>Febre acuta maligna</i>                                       | 203 (6.8)                | 133 (8.2)    | 70 (5.2) <sup>*</sup>   | 45 (4-93)                    | 7 (0.4) <sup>***</sup>        | 196 (16.4)     | 78                                      | 9 (3-20)       |
| <i>Febre maligna</i>                                             | 74 (2.5)                 | 47 (2.8)     | 27 (2.0)                | 40 (5-70)                    | 55 (3.1) <sup>*</sup>         | 19 (1.6)       | 7                                       | 7 (4-15)       |
| <i>Febre terzana</i>                                             | 15 (0.5)                 | 8 (0.5)      | 7 (0.5)                 | 60 (21-75)                   | 6 (0.3)                       | 9 (0.8)        | 2                                       | 37 (14-60)     |
| <i>Febre peracuta</i>                                            | 14 (0.5)                 | 9 (0.6)      | 5 (0.4)                 | 49 (25-70)                   | 0 (0) <sup>***</sup>          | 14 (1.2)       | -                                       | -              |
| <i>Febre frenetica</i>                                           | 12 (0.4)                 | 8 (0.5)      | 4 (0.3)                 | 30 (20-70)                   | 12 (0.7) <sup>*</sup>         | 0 (0)          | -                                       | -              |

<sup>‡</sup>Gender missing in three cases. <sup>§</sup>Certifier missing in one case. <sup>\*</sup>p-value <0.05; <sup>\*\*</sup>p-value <0.001; <sup>\*\*\*</sup>p-value <0.0001

## Milan's fever epidemic of summer 1629

323

### 324 **FIGURE LEGENDS**

325 Fig. 1: The number of deaths recorded in Milan's *Liber Mortuorum* for each month of 1629, and the  
326 mean (min-max) monthly number of deaths in the period 1601- 1628.

327 Fig. 2: Deaths recorded in 1629, stratified by gender and age group at the time of death (age not  
328 available in 200 cases).

329 Fig. 3: Weekly distribution of the deaths attributed to fever without any described organ  
330 involvement in comparison with the distribution of deaths due to fever with gastrointestinal  
331 symptoms, fever with respiratory symptoms, and *febre etica*.

332 Fig. 4: Number and percentage of deaths due to fever without any described organ involvement,  
333 stratified by gender and age.

334 Supplementary Figure 1. Monthly distribution of deaths due to the different types of fever.

Figure 1

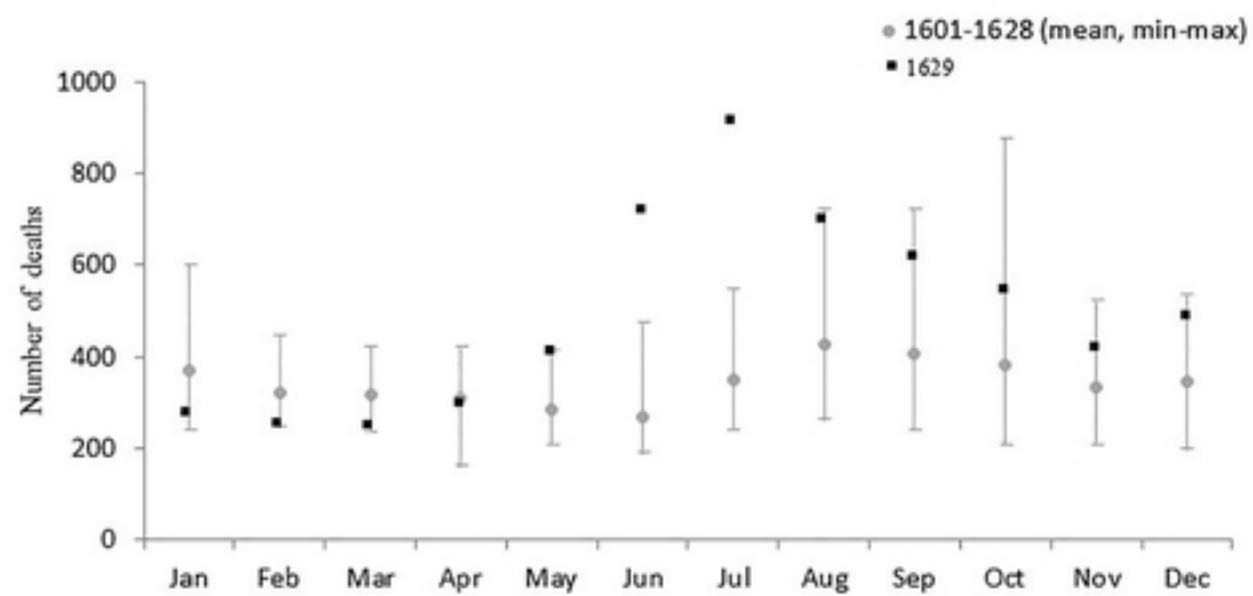

Figure 1

Figure 2

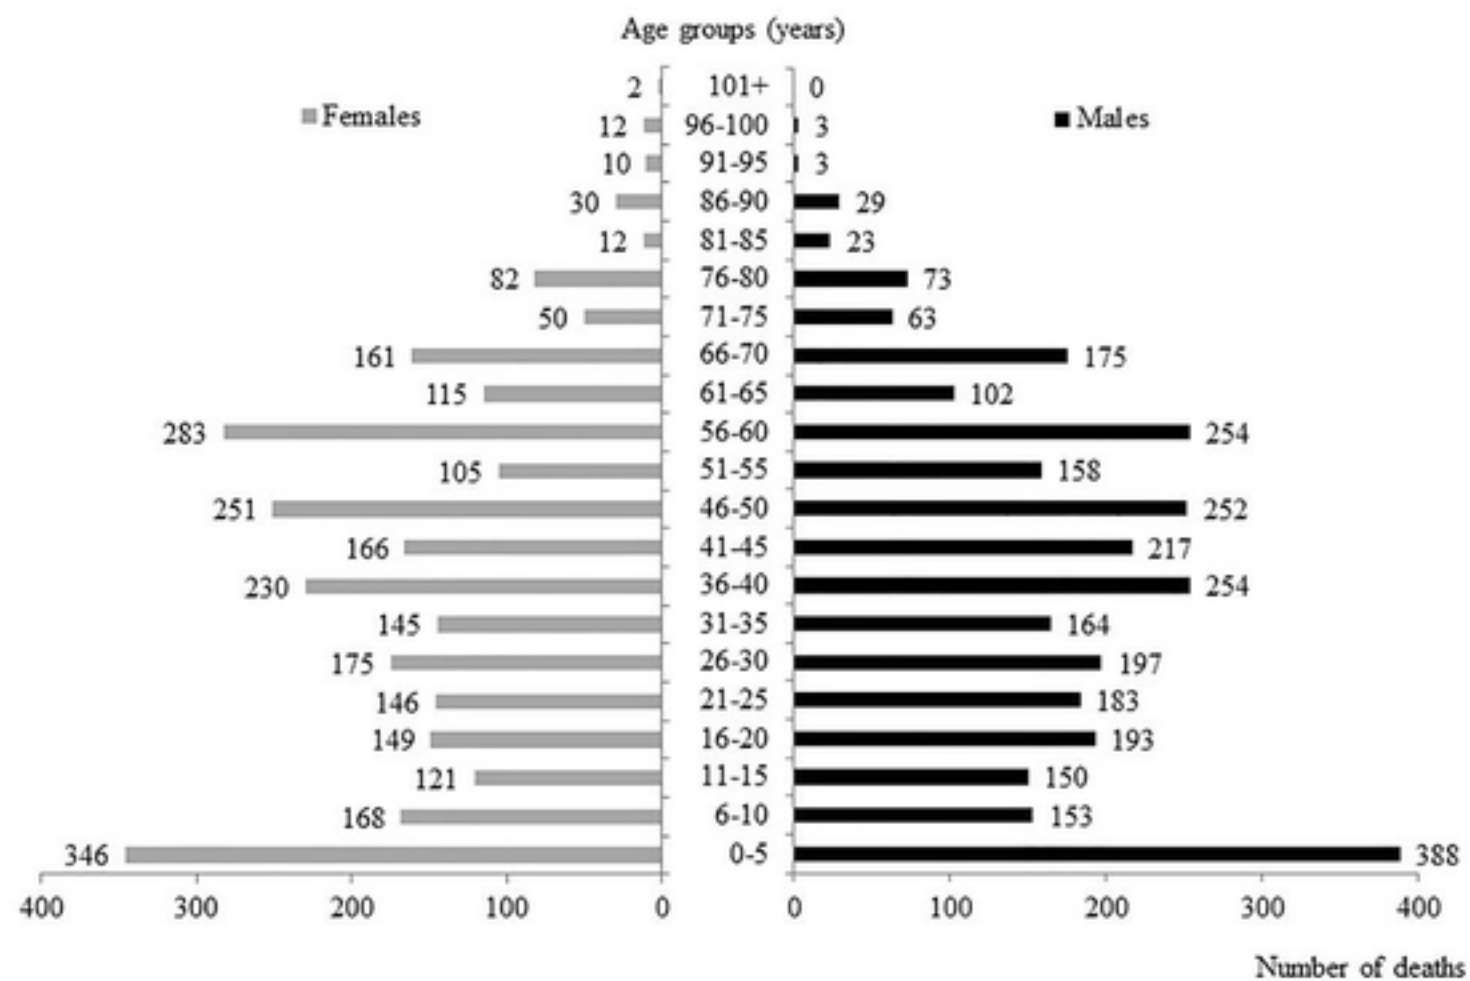

Figure 2

Figure 3

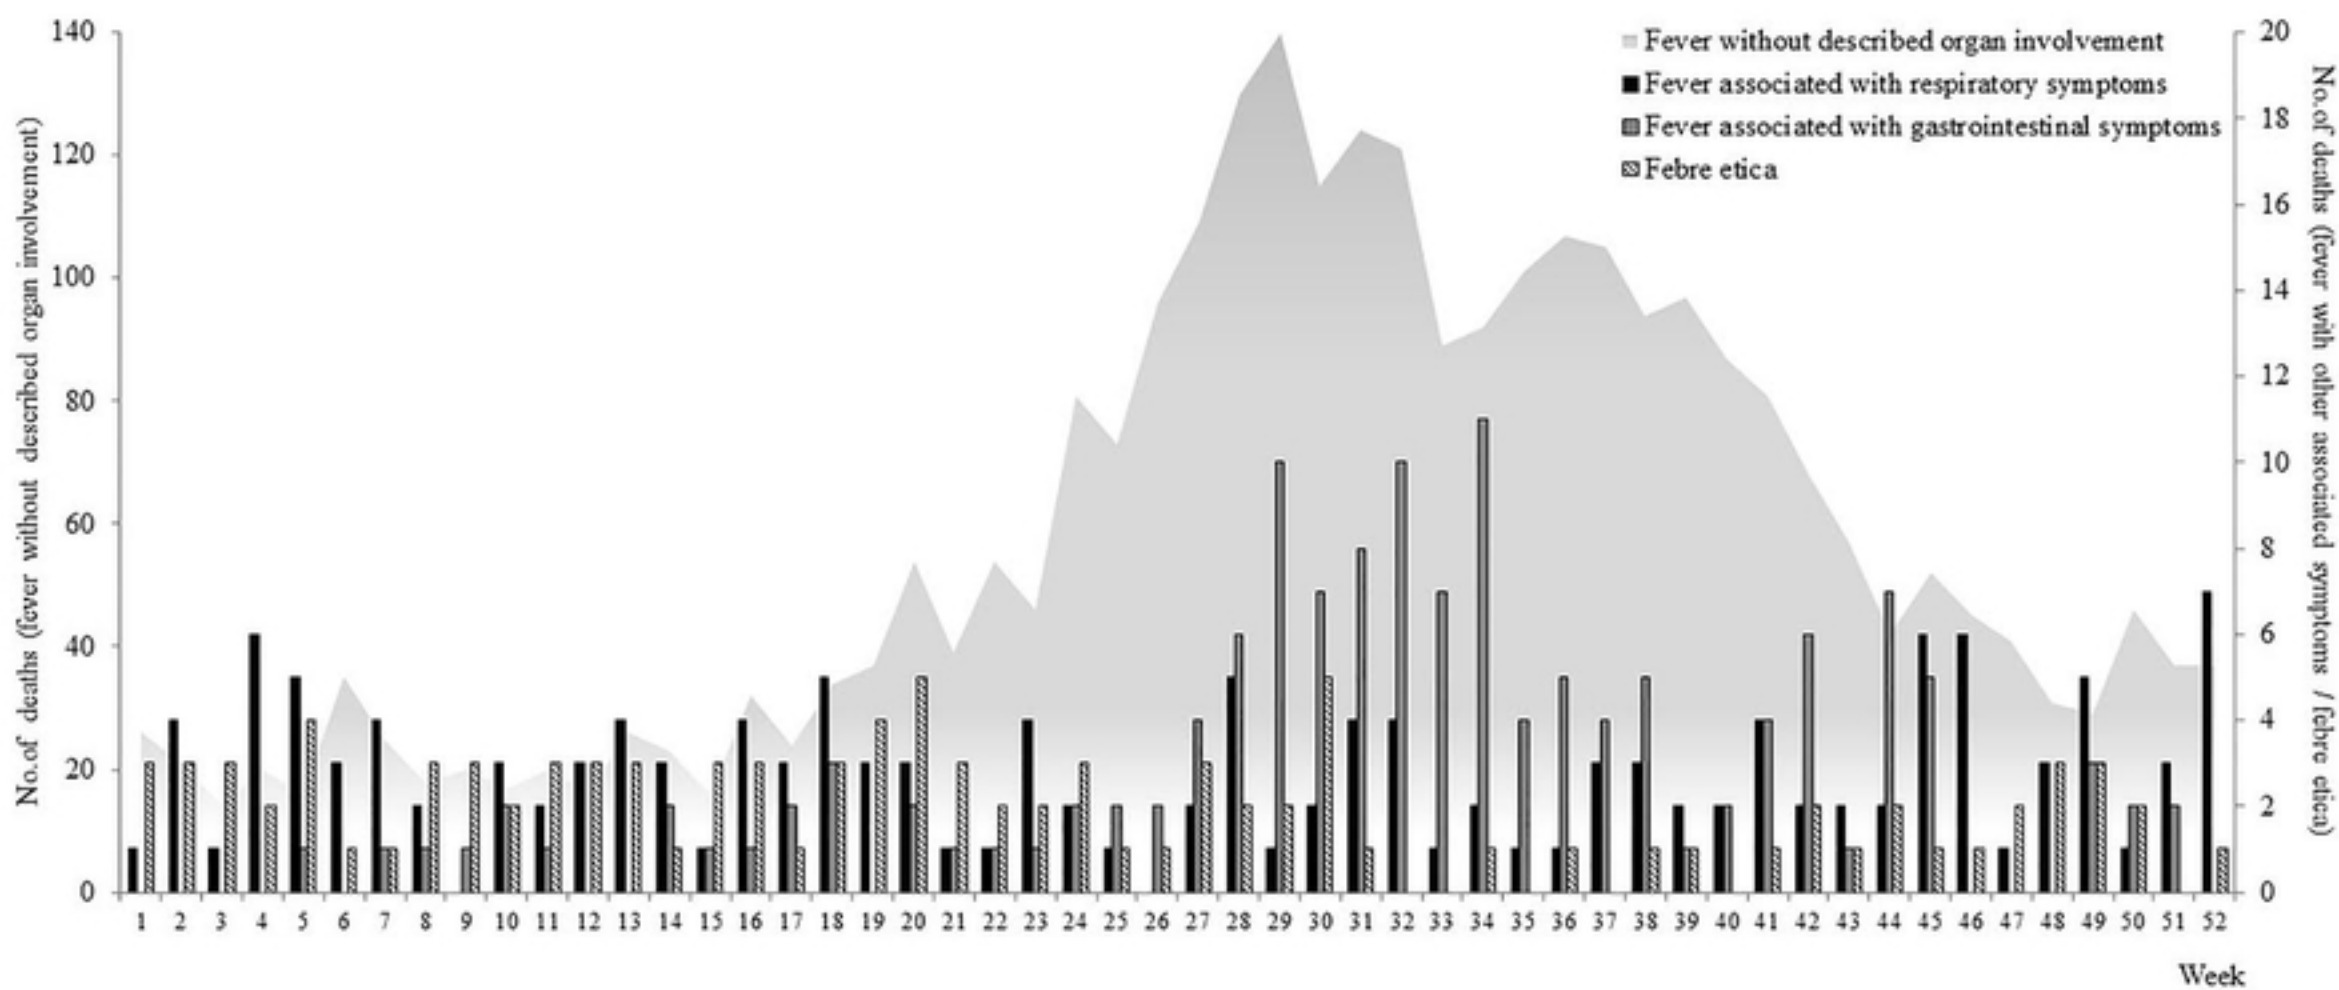

Figure 3

Figure 4

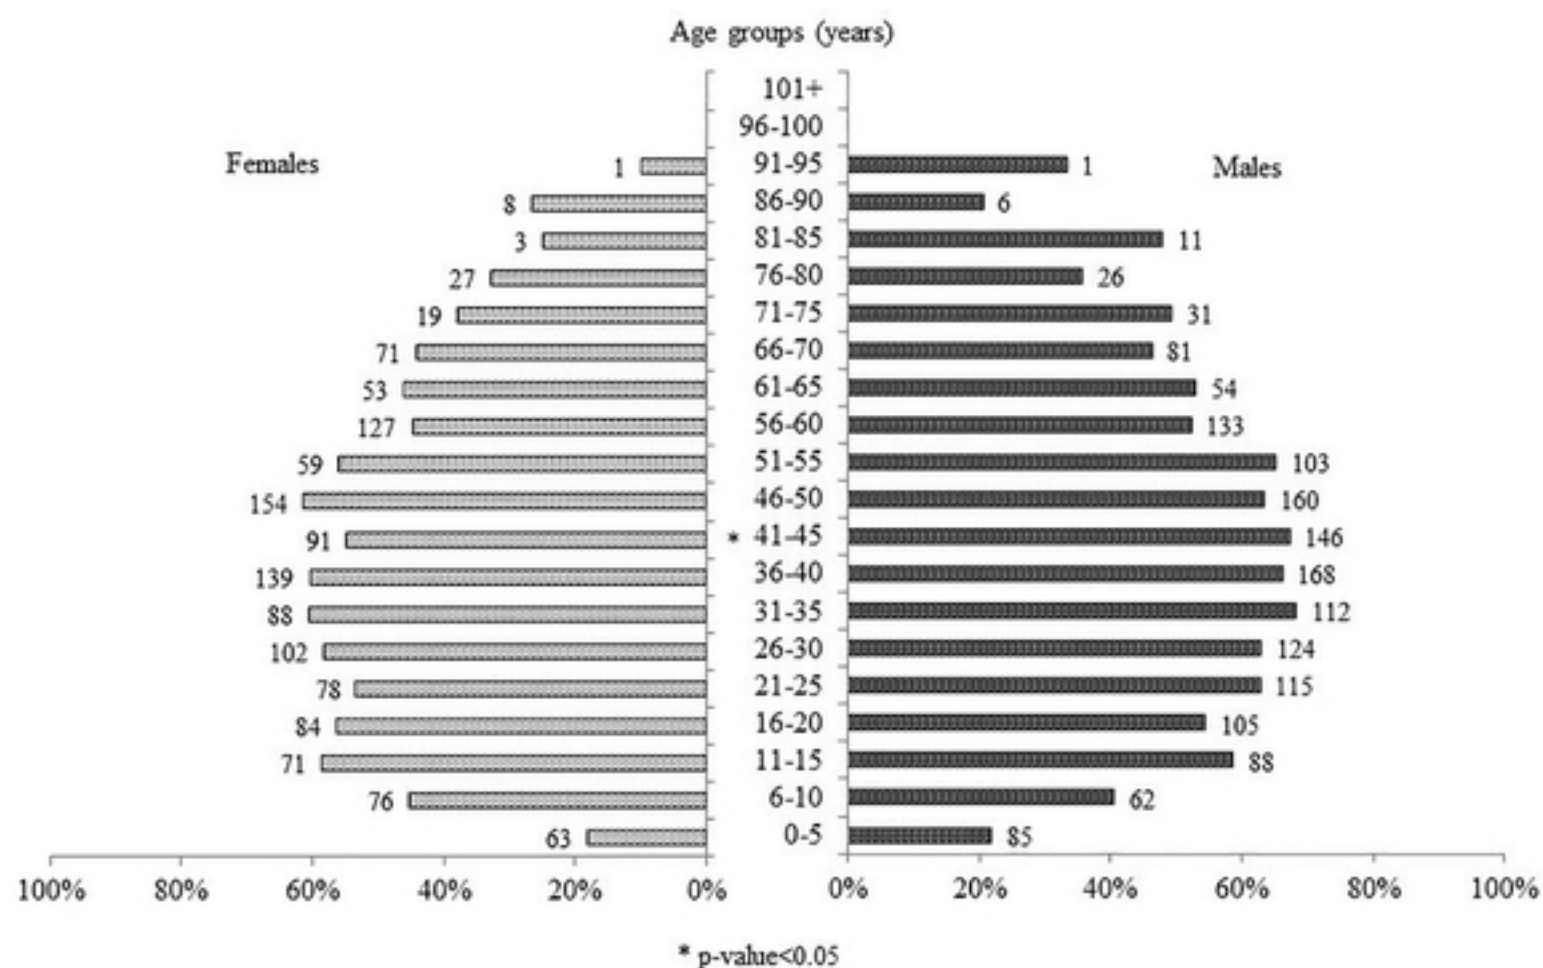

Figure 4
